# Supplementary material
Source: publisher site journal article supplement (https://www.kjim.org/upload/media/kjim-2025-386-Supplementary-Fig-1.pdf)
Supplement: Supplementary file 1 [file kjim-2025-386-Supplementary-Fig-1.pdf]

Men

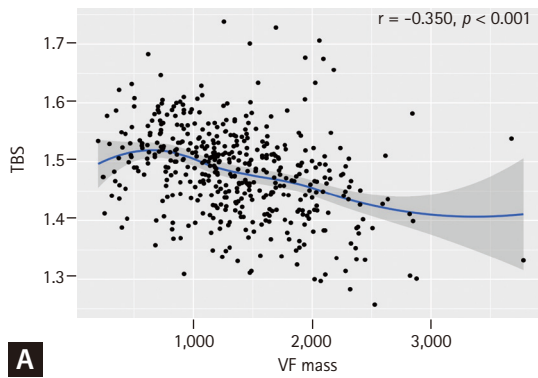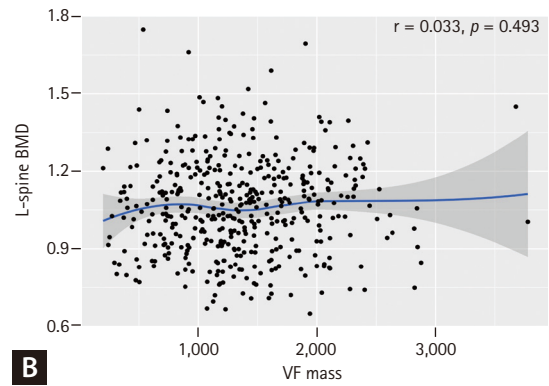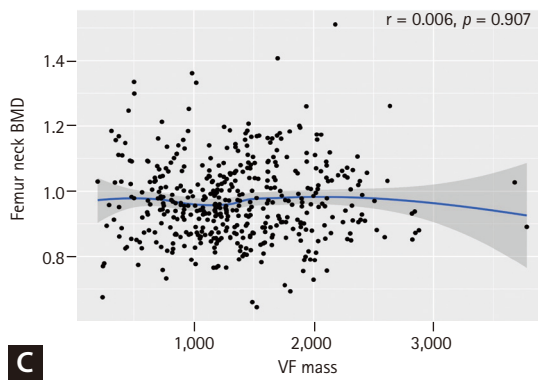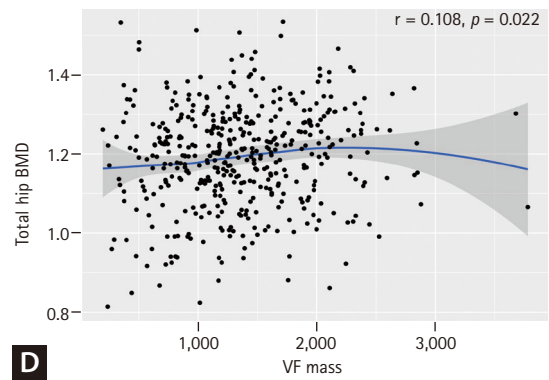

**Supplementary Figure 1.** Scatter plots showing associations between VF mass and bone parameters at all skeletal sites in men (A-D) and postmenopausal women (E-H). (A, E) TBS; (B, F) L-spine BMD; (C, G) femur neck BMD; (D, H) total Hip BMD. Blue lines represent smoothed curves from generalized additive models with 95% confidence intervals (shaded areas). Pearson correlation coefficients ( $r$ ) and  $p$  values are displayed. TBS, trabecular bone score; VF, visceral fat; BMD, bone mineral density.

Postmenopausal Women

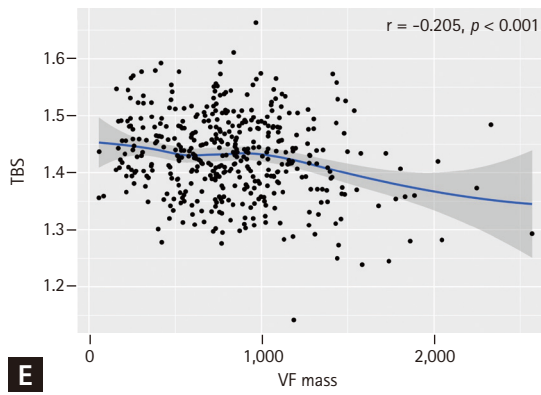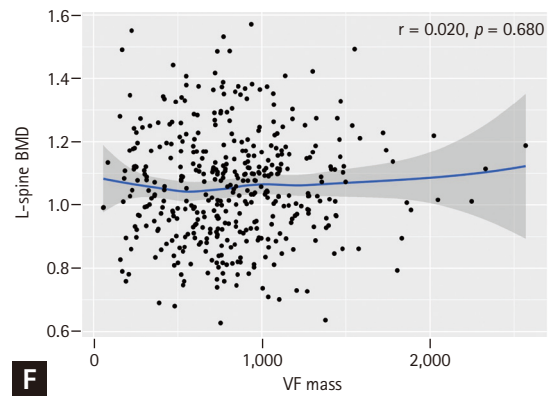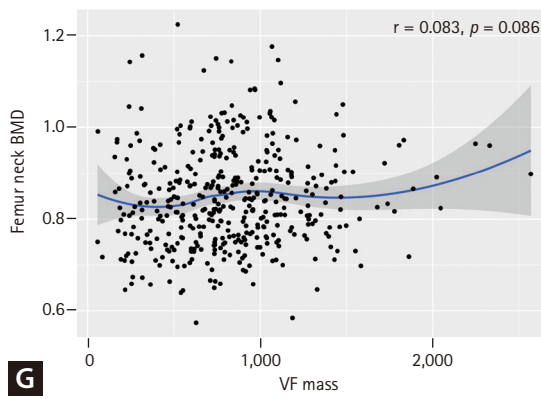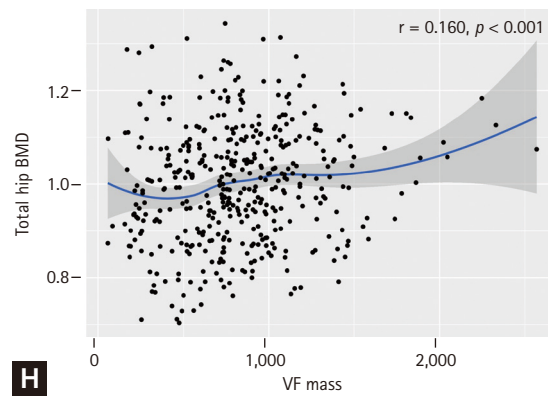

Supplementary Figure 1. Continued.
